1 Effect of Midwife-Led Pelvic Floor Muscle Training on Prolapse Symptoms and Quality of Life  
2 in Women with Pelvic Organ Prolapse in Ethiopia: A Cluster-Randomized Controlled Trial

3

4 Melese Siyoum (MS)<sup>1,2\*</sup>, Rahel Nardos (RN)<sup>3</sup>, Biniyam Sirak (BS)<sup>4</sup>, Theresa Spitznagle (TS)<sup>5,6</sup>,  
5 Wondwosen Teklesilasie (WT)<sup>2</sup>, Ayalew Astatkie (AA)<sup>2</sup>

6

7 <sup>1</sup> Department of Midwifery, College of Medicine and Health Sciences, Hawassa University,  
8 Hawassa, Ethiopia

9 <sup>2</sup> School of Public Health, College of Medicine and Health Sciences, Hawassa University,  
10 Hawassa, Ethiopia

11 <sup>3</sup> Department of Obstetrics and Gynecology, and Women's Health, University of Minnesota,  
12 USA

13 <sup>4</sup> Addis Ababa Fistula Hospital, Ethiopia

14 <sup>5</sup> Program in Physical Therapy, Washington University in St Louis, USA

15 <sup>6</sup> Worldwide Fistula Fund, USA

16

17

18

19 **\*Corresponding Author**

20 Melese Siyoum

21 Email: [melesesiyoum755@gmail.com](mailto:melesesiyoum755@gmail.com)

22

## 23 **Abstract**

24 **Back ground:** Pelvic organ prolapse (POP) is a common condition that can significantly impact  
25 a woman's quality of life. Pelvic floor muscle training (PFMT) is recommended as a first-line  
26 conservative treatment for prolapse, but evidence on its effectiveness from low-resource settings  
27 is limited.

28 **Objectives:** This study aimed to assess the effect of midwife-led pelvic floor muscle training on  
29 prolapse symptoms and health-related quality of life (HRQoL) among women with mild to  
30 moderate pelvic organ prolapse in Ethiopia.

31 **Methods:** A community-based, parallel-groups, two-arm cluster randomized controlled trial was  
32 conducted in Dale and Wonsho districts of Sidama Region, Ethiopia. Women with symptomatic  
33 POP stages I-III were randomized by cluster to receive either midwife-led PFMT plus lifestyle  
34 counseling (intervention group) or lifestyle counseling alone (control group). The primary  
35 outcomes were change in prolapse symptom score (POP-SS) and prolapse quality of life (P-  
36 QoL). Mixed-effects generalized linear model was used to determine the effect of PFMT on  
37 prolapse symptoms and P-QoL at 99% confidence level. Adjusted  $\beta$  coefficients were used as  
38 effect measures. The level of significance was adjusted for multiple comparisons.

39 **Results:** A total of 187 women were randomized to intervention (n=89) and control (n=98) arms.  
40 At sixth months, the intervention group showed significantly greater improvements both in  
41 prolapse symptoms and P-QoL with a mean change difference of -4.1 (99% CI: -5.38, -2.83) in  
42 prolapse symptoms; -11.48 (99% CI: -15.9, -7.1) in physical domain of P-QoL; -12.65 (99% CI:  
43 -19.3, -6.1) in psychological domain of P-QoL, and -9.47 (99% CI: -15.5, -3.5) in personal  
44 relationship domain of P-QoL. A significantly higher (84.2%) of women in the intervention  
45 group perceived their condition as "better" after the intervention as compared to 41.7% in control  
46 group. Women with earlier stages of prolapse (stage I and II) experienced higher benefits  
47 compared to those in stage III.

48 **Conclusions:** A midwife-led PFMT combined with lifestyle counseling significantly improves  
49 prolapse symptoms and quality of life in mild to moderate POP. This strategy can be integrated  
50 into the existing maternal and reproductive health programs to address POP in low-income  
51 settings where access to trained specialist is limited.

- 52 **Trial registration:** Pan African Clinical Trial Registry (PACTR202302505126575).
- 53 **Keywords:** Pelvic organ prolapse, pelvic floor muscle training, cluster randomized trial, quality
- 54 of life, Ethiopia.

## 55 **Introduction**

56 Symptomatic pelvic organ prolapse (POP) is the descent of one or more of the uterus, cervix,  
57 anterior or posterior vaginal wall, or the vaginal apex from its normal position. This descent can  
58 be caused by deficient pelvic fascia, or weakness in the ligaments or muscles that support the  
59 pelvic organs [1]. These structures can be affected by several risk factors including aging,  
60 vaginal childbirth, chronic constipation, hereditary connective tissue weakness, persistent  
61 elevated intra-abdominal pressure (IAP), menopause, and heavy lifting [2].

62 Pelvic organ prolapse (POP) is a prevalent condition affecting many women globally, with  
63 estimated prevalence rates varying widely from 1% to 65% [3, 4]. This broad range can be  
64 attributed to the challenges in accurately estimating prevalence, largely due to the differing  
65 methodologies employed in various studies. For instance, researchers may utilize a variety of  
66 symptom questionnaires and clinical examination techniques, leading to inconsistencies in the  
67 reported prevalence [3, 5].

68 Women with symptomatic POP present with a range of prolapse-related symptoms that are  
69 associated with the urinary, sexual, and anorectal symptoms [6]. It is evidenced that depressive  
70 symptoms and sexual function disorders are frequently associated with POP [7, 8]. In addition to  
71 disrupting daily functioning, these multifaceted symptoms of POP have significant negative  
72 impact on patients overall quality of life, body image and sexual function [8]. The severity of  
73 symptoms is directly related to the degree of prolapse. As the prolapse descends closer to or  
74 beyond the hymen, the symptoms become more frequent and bothersome [9, 10].

75 The current POP treatment options are either surgery or conservative managements approaches  
76 [11]. The conservative management options include pelvic floor muscle training (PFMT),  
77 pessary, life style modification, or watchful waiting, which are recommended as first-line options  
78 if the prolapse is not the indication for corrective surgery [2]. Conservative management has the  
79 advantage of causing fewer adverse effects and complications [12]. The existing evidence shows  
80 that PFMT has positive effect on prolapse symptom and severity [13]. Due to its effectiveness  
81 and safety, PFMT is indicated as a first-line treatment for women with mild to moderate POP  
82 [13]. PFMT improves prolapse symptoms by improving pelvic muscle strength, endurance,  
83 power, relaxation and combination of these parameters [1].

84 Awareness of POP and conservative treatment option is very poor among women [14] and  
85 healthcare professionals [15] even in high-income countries. To enhance the accessibility and  
86 variety of service for women, it is essential to understand various models of service delivery  
87 [16]. In low- and middle-income countries, evidence about the feasibility and effect of PFMT on  
88 prolapse symptoms and health-related quality of life (HRQoL) is limited.

89 In Ethiopia, there is scarcity of evidence on the effectiveness of PFMT, and women often seek  
90 healthcare only at advanced stages of prolapse [17] when impact of PFMT may be limited.  
91 Additionally, the number of trained specialists such as urogynecologists or physical therapist are  
92 limited in Ethiopia. There are only 450 gynecologists registered in the Ethiopian Society of  
93 Obstetricians and Gynecologists out of which only 15 are urogynecologists and 13 are  
94 urogynecology fellows in 2021 [18]. In areas of the world with developed physical therapy  
95 training (PT) programs, (PT) management of pelvic organ prolapse is the gold standard for  
96 administering the service [19]. However, it is considered a sub-specialty within the profession  
97 and currently the Ethiopian Ministry of Health does not support specialty practice for the  
98 profession of Physical Therapy [20]. Fortunately, there is an abundance of trained Midwives in  
99 Ethiopia [21], who are potentially capable of learning how to deliver PFMT service. To address  
100 these challenges and improve access to the conservative management options, research into  
101 different models of PFMT service delivery is critical particularly in low resource settings.

102 The aim of this study was to assess the effect of PFMT provided by trained midwives on  
103 prolapse symptoms and HRQoL among women with mild to moderate POP (stage I-III) in  
104 Sidama region, Ethiopia. Our hypothesis was that providing midwife-led PFMT monthly  
105 followed by three times per-day home-based exercise by participants for six months will improve  
106 prolapse symptoms and prolapse related quality of life.

107

## 108 **Methodology**

### 109 **The Consolidated Standards of Reporting Trials (CONSORT) Checklist**

110

111 The CONSORT (Consolidated Standards of Reporting Trials) 2010 statement [22] was used to  
112 guide the reporting of this cRCT. The CONSORT checklist consists of a 25-item checklist that

113 focuses on the key elements for reporting the design, conduct, analysis, and interpretation of  
114 RCTs. An extension to the CONSORT statement for reporting cluster randomized trials (cRCTs)  
115 [23] was also consulted. We have addressed all applicable items from the CONSORT checklist  
116 in the reporting of this cRCT (Supplementary File 1).

## 117 **Study area and period**

118 This study was conducted in the Health and Demographic Surveillance Site (HDSS) of Hawassa  
119 University, known as the Dale-Wonsho Health and Demographic Surveillance Site (D-W  
120 HDSS). D-W HDSS is located in the Dale and Wonsho districts of Sidama National Regional  
121 State of Ethiopia. The details of the study area have published elsewhere [24]. The enrollment  
122 period was open for eight months from 13 March to 28 October 2023. Each participant was  
123 followed for six months after enrollment. The last participants were enrolled on October 28,  
124 2023 so the final follow-up visit was on April 27, 2024.

125

## 126 **Study design and participants**

127 A community-based, parallel-groups, two-arm, cluster-randomized controlled trial (cRCT) was  
128 conducted among women with symptomatic POP stages I-III in D-W HDSS. First, a baseline  
129 survey was conducted to determine the burden and risk factors of POP and to identify eligible  
130 cases [24]. Women aged over 18 years with at least one symptom of POP, confirmed as stages I-  
131 III using the standard POP-Q measure, were included in the study. The identified cases were then  
132 randomized by community clusters into intervention and control arms. Cluster randomization  
133 was preferred to minimize spillover of the intervention to the control arm and due to the  
134 feasibility of providing the intervention at group level (nearby health facility). The clusters were  
135 *kebeles* which are the smallest administrative units in Ethiopia, similar to neighborhoods or  
136 wards. They have a wide range of population sizes, from 500 to several thousand residents [25].  
137 The surface area of *kebeles* varies depending on their location and population density, with those  
138 in densely populated urban areas being smaller compared to rural *kebeles*. Each *kebele* is further  
139 divided into smaller units called *gots* or *villages*. *Kebele* administrations are responsible for  
140 providing basic services, such as health, education, and infrastructure, to their residents. They  
141 also play a crucial role in population-based surveys and research studies in Ethiopia, often

142 serving as the primary sampling units [26, 27]. Kebeles are organized into larger  
143 administrative divisions known as woredas (Districts).

144

#### 145 **Sample size determination**

146 Sample size calculations were performed using Open-Epi version 3.1, based on the following  
147 assumptions: a 99% confidence level, 80% power, an exposed-to-unexposed ratio of 1, a POP-SS  
148 mean difference of 3.16 with a standard deviation of 4.78 in the intervention group, and a mean  
149 difference of 0.12 with a standard deviation of 3.86 in the control group over six months [15].  
150 This calculation yielded a required sample size of 96, adjusted for an anticipated 16% refusal and  
151 loss to follow-up [15], resulting in an individual-based total sample size of 111.34. This sample  
152 size was utilized for all outcomes since we were unable to determine the effect of pelvic floor  
153 muscle training (PFMT) on quality of life as measured by the Prolapse Quality of Life  
154 Questionnaire. The decision to adjust the confidence level to 99% was based on the adjusted  
155 level of significance to 0.0125 than the usual p-value of 0.05 to account for multiple comparisons  
156 across various outcomes (POP-SS and three distinct domains of P-QoL).

157 To determine the minimum number of clusters required, the individual-based sample size was  
158 multiplied by the intra-cluster correlation coefficient (ICC). Since there was no reported ICC  
159 from earlier studies, we used an ICC of 0.03, which was suggested as estimated fairly typical  
160 value of the Intra-Cluster Correlation (ICC) [28, 29]. This calculation indicated a need for 1.67  
161 clusters per arm. To ensure adequate power [30, 31], a total of eight clusters were selected  
162 randomly from the 12 available clusters in the D-W HDSS.

163 After adjusting for cluster effects with a variance inflation factor (VIF) of 1.39, the total effective  
164 sample size increased to 155, resulting in an expected average of 19.4 participants per cluster.  
165 However, during enrollment, a slightly higher number of eligible cases was identified in each  
166 cluster. Excluding these additional participants was deemed unethical, and alternative treatment  
167 options could not be provided due to the cRCT design. Furthermore, it was believed that  
168 including all eligible cases would be manageable and enhance the study's power [28, 29].

169 Consequently, all eligible cases were included, raising the total sample size from 155 to 187  
170 participants.

### 171 **Randomization and concealment**

172 The study site, D-W HDSS, comprises eight kebeles from Dale district and four kebeles from  
173 Wonsho district. These were stratified into two strata based on their geographical location (Dale  
174 and Wonsho districts). Stratifying on location reduces stratum variability and helps to ensure that  
175 they are balanced across study arms [30, 31]. To improve similarity across treatment and control  
176 groups, a balanced number of clusters from each stratum were assigned to each arm. First all  
177 eligible clusters in each district were listed and assigned a unique identifier number. Then, a  
178 lottery method was used to select two of four clusters from Wonsho district and randomly  
179 assigned to each arm. Similarly, six of eight clusters from Dale districts were selected and three  
180 clusters were assigned to each arm randomly by lottery method.

181 To reduce the risk of spillover-effect of the intervention, the interventional and control clusters  
182 were separated by a buffer zone [30], and when it is impossible due to the limited number of  
183 clusters in the D-W HDSS, adjacent clusters were assigned to the same arm. Finally, all eligible  
184 study participants from each cluster identified during the baseline survey were included in the  
185 study (Figure 1).

186 Allocation concealment was conducted by staff of D-W HDSS at Hawassa University. To ensure  
187 unbiased allocation, the lottery method was performed by an independent researcher who was  
188 not involved in the recruitment, intervention, or outcome assessment processes. Two staff  
189 members of Yirgalem Hamline Fistula center, who performed pelvic examination to determine  
190 POP stage, recruited eligible participants of for intervention.



191

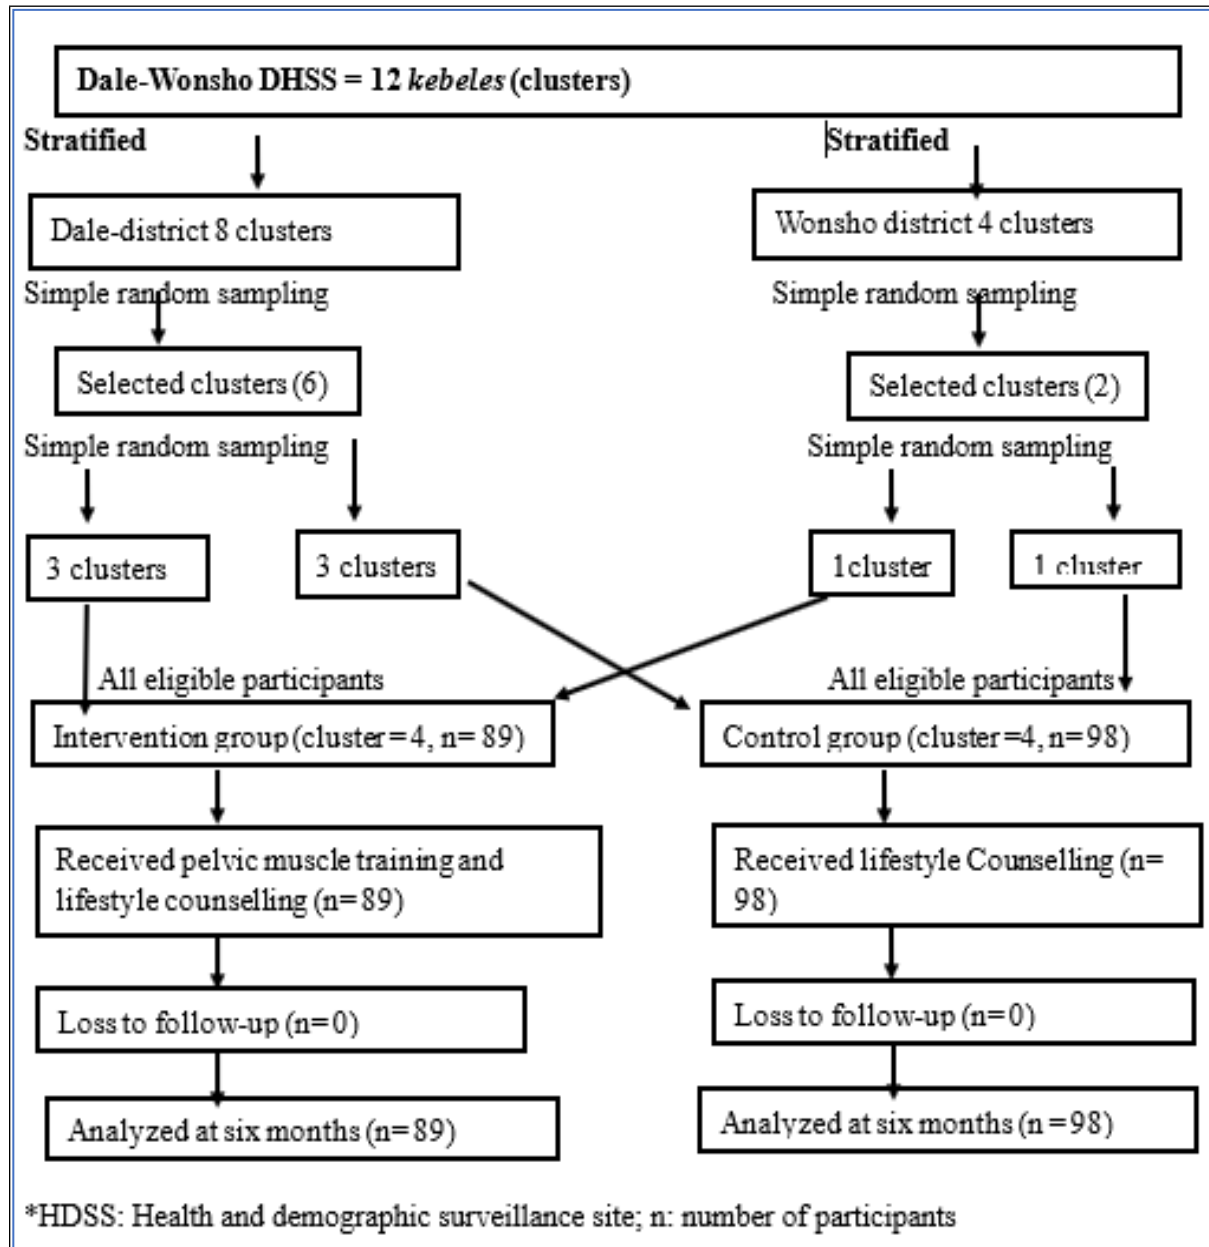

192

193 Figure 1: Randomization and Sampling procedure used to assess the effect of pelvic floor muscle  
194 training on prolapse symptoms and quality of life in Sidama Region, Ethiopia, August 2024.

195

196 **Blinding (Masking)**

197 The participants in the intervention group were aware that they were receiving the PFMT  
198 program but they were not aware of the control group. Similarly, the control group knew that  
199 they are receiving life style counselling but they are not aware of the intervention group. The  
200 same is true for the healthcare providers delivering the counselling. Moreover, the outcome  
201 assessors, who collected data at the end of intervention, were blinded to the participants’  
202 treatment allocation.

203

204 **Description of the intervention**

205 Each cluster in the study area is served by its own health posts, staffed by health extension  
206 workers, while five or more clusters are supported by a single health center. These health centers  
207 are staffed by formally trained healthcare professionals, including midwives. The current  
208 intervention was implemented at these health centers due to their capacity to deliver the training  
209 and their geographical accessibility to participants, especially when compared to hospitals.

210 In this study area, all health centers have at least three degree-holding midwives responsible for  
211 providing antenatal, delivery, and postnatal care. Each health center is equipped with various  
212 rooms, including delivery rooms, cervical cancer screening rooms, and outpatient rooms, which  
213 are suitable for conducting the Pelvic Organ Prolapse Quantification (POP-Q) assessments and  
214 ensuring confidentiality during individual counseling sessions.

215 From each selected health facility, two female midwives were trained either on pelvic floor  
216 muscle training and how to counsel patients, or only on how to counsel for life style modification  
217 based on their pre-allocated health facility. The training that included education on theory,  
218 simulation, and video aids was given by a fellowship trained urogynaecologist. Then, the trained  
219 midwives administered the intervention to the women assigned in the intervention arms.

220 Women who were assigned to intervention received pelvic floor muscle training and prolapse  
221 lifestyle advice focusing on risk factors for POP such as constipation, chronic coughing, heavy  
222 lifting, and other medical conditions. The control group received only lifestyle modification.

223 In the interventional group, the pelvic examiners link eligible women to the assigned midwife  
224 with the POP-Q findings. Then, at the initial visit, women were informed by midwives about the  
225 stage of POP they had and type of prolapse (anterior, posterior, or central) which was explained  
226 in a private room. Then the advantage of pelvic floor muscle exercise, and how it works, the  
227 detail of the exercise and follow-up schedule were explained in detail at group level in a private  
228 room for 40-60 minutes.

229  
230 They were trained to sit or lie comfortably, train pelvic muscles with 10 times 10-second maximum  
231 holds, and 10 fast contractions [15, 32]. They were instructed to repeat this at least three times per  
232 day (morning, afternoon, and night) [15, 33]. Women were taught how to precontract the pelvic  
233 floor muscles against increases in intra-abdominal pressure (Knack exercise). They were trained  
234 to exercise 10 long squeezes and lift contractions, each held for 10 seconds, allowing time  
235 between the squeeze to relax and lower the muscle for up to 5 seconds. The long squeezes were  
236 followed by 10 short squeezes. Women were advised to try to feel the releasing and relaxing of the  
237 squeeze after 10 short squeezes, and finally, to do a squeeze with a light cough for 10 times. The  
238 long squeezes were for 10 seconds each and the 10 quick squeezes for 1-2 seconds each.

239 To help participants correctly identify and contract their pelvic floor muscles, the participants in  
240 the intervention group received pelvic floor muscle training with internal digital biofeedback  
241 administered by the trained midwives. During the individual training sessions, midwives used  
242 various verbal cues and analogies. For example, participants were instructed to "imagine you are  
243 trying to stop the flow of urine or hold back gas. Squeeze as though you are trying to slow down  
244 or stop your urine mid-stream" [34]. This relevant analogy helped participants visualize the  
245 specific action they needed to perform. Throughout the exercises, midwives provided descriptive  
246 feedback to guide participants. They would say things like, "As you squeeze, focus on lifting the  
247 muscles around your vagina and anus upwards. You should feel a tightening and lifting  
248 sensation" [32, 34, 35]. This encouraged participants to be aware of the specific muscles being  
249 engaged during the contractions. The detail of the counselling was provided using a *Sidaamu*  
250 *Afoo* (local language) version of a the PROPEL realist evaluation guideline [33].

251 They were appointed to attend five visits (at weeks 0, 2, 6, 10, and 15) at a nearby health facility.  
252 The appointment frequency was adapted from the United Kingdom National Health Service

253 (NHS) [36]. Initial appointments were scheduled closely together to reinforce correct exercise  
254 techniques and ensure participants fully understood all the advice provided. Subsequently,  
255 appointments were spaced further apart to promote independent home exercise. A 15-weeks  
256 intensive training was recommended to get adequate muscle strength [37]. The change in  
257 prolapse symptoms and health related quality of life were analyzed at six months.

258

## 259 **Data Collection Tools and Measurements**

260 Our primary outcomes were pelvic organ prolapse symptoms and health-related quality of life  
261 (HRQoL). The POP-SS was measured by the *Sidaamu Afoo* version of the pelvic organ prolapse  
262 symptom score (POP-SS) questionnaire [38]. The psychometric properties of the questionnaire  
263 have been evaluated in the same setting and found to have acceptable reliability and validity. It is  
264 a patient reported-outcome measure that contain seven items with five Likert-scale ranging from  
265 0 to 4, with a possible total score of 0 to 28 (the higher score representing worse symptom) [39].  
266 Health-related quality of life was measured by using the prolapse quality of life (P-QoL)  
267 questionnaire translated from the Amharic version [40]. While the original version has 20 items  
268 with nine domains [41], in a previous work designed to adapt the P-QoL locally (*to Amharic*  
269 *version*), the dimensions have been condensed into three: physical function (including General  
270 health perception (GHP), prolapse impact (PI), role (RL), physical (PL) and social limitation  
271 (SL), and severity measures (SM)); psychological function (including emotional disturbances  
272 (EMO) and sleep/energy disturbances (SE)); and personal relationships ((PR). Each domain is  
273 related to a particular aspect of QoL, and scores in each domain range from 0 to 100, the higher  
274 score indicating poor quality of life. This tool has previously been validated in a similar context  
275 (northern Ethiopia).

276 The secondary outcome, women's perceived change in prolapse, was evaluated using the patient  
277 global impression of change index (PGI-I), a seven-point Likert scale (1 = very much better to 7  
278 = very much worse) [42]. In this study, patients were classified as improved if they scored 1, 2,  
279 or 3 on the PGI-I scale, no change if they scored 4 and worse if they scored 5, 6 or 7.

280 Intervention adherence was measured in terms of attendance at appointments [15] and the  
281 amount of exercise women reported at follow-up time. Women's adherence to training protocol

282 is considered adequate when they complete at least 80% of the training sessions given by  
283 midwives [43].

284

### 285 **Data Collection Procedures**

286 The details of the baseline data collection procedures and tools have been published elsewhere  
287 [24]. All tools were translated from English and Amharic into the local language (*Sidaamu*  
288 *Afoo*).

289 The baseline data about sociodemographic characteristics and prolapse symptoms were collected  
290 through face-to-face interview with women at their home by eight first degree nurses using  
291 electronic data collection forms prepared using Kobo tool box. The women were subsequently  
292 invited for pelvic examination in a nearby health center to confirm their prolapse status and  
293 degree of prolapse by using the POP-Q [44]. The POP-Q was performed by staff members of  
294 Yirgalem Hamlin Fistula Center who have special training on Fistula and POP identification.  
295 Then women with symptomatic POP stages I-III were interviewed how much the prolapse had  
296 affected their quality of life using P-QoL tool. The detail POP-Q procedures and data quality  
297 assurance method was published elsewhere [24].

298 At three months and six months of intervention, four first degree nurses went to the house of the  
299 study participants and collected the data through face-to-face interviews. The data collection tool  
300 included the POP-SS and P-QoL questionnaires used at baseline, PGI-I change and questions  
301 used to assess their adherence to training protocol [43].

302

### 303 **Statistical analysis**

304 All data analyses accounted for the complex sampling design, which included stratification by  
305 district (Dale and Wonsho), clustering by kebele, and weighting for unequal probability of  
306 selection. The weighting variable was the product of cluster and household selection weights,  
307 normalized by dividing each unit's survey weight by the unweighted average of the survey  
308 weights. Categorical variables were summarized as frequencies and percentages, while

309 continuous variables were summarized using means and standard deviations or medians and  
310 interquartile ranges.

311 The analysis was based on the intention-to-treat principle. In practice, all participants adhered to  
312 their allocated treatment and completed the follow-up as scheduled. Although the intervention  
313 was randomly assigned at the cluster level, outcomes were evaluated at the individual level. To  
314 compare the primary outcomes at six months, we fitted a multilevel mixed-effects generalized  
315 linear model (MEGLM) to the change from baseline in POP-SS and each domain of HRQoL at  
316 three and six months. The model included fixed effects for treatment group, time, and other  
317 relevant covariates, as well as a random intercept for patients within centers and a random slope  
318 for time within patients. MEGLM was chosen for its flexibility and robustness needed to  
319 accurately model the complex and varied data structures often found in cRCT leading to more  
320 reliable and interpretable results [45].

321 The difference between intervention and control group was estimated by mean change from  
322 baseline at six months. Bonferroni correction for multiple measurement [46] was used to adjust  
323 level of significance to 0.0125 as we measured effect of PFMT on four outcomes (POP-SS and  
324 three domains of HRQoL). Then a mean change difference between the intervention and control  
325 arms was presented with 99% confidence interval and p-values. This adjustment is crucial for  
326 maintaining statistical rigor and minimizing the risk of Type I errors in the analysis [46].

327 To evaluate model fit, we initially fitted a null model for each outcome variable (POP-SS and the  
328 three domains of Prolapse Quality of Life (P-QoL)), incorporating random effects for both  
329 cluster and participant ID. We calculated the intraclass correlation coefficient (ICC) to determine  
330 the proportion of variance in the outcome attributable to the clustering structure, which was  
331 found to be 4% and less in this study. Subsequently, we fitted models that included the  
332 intervention variable along with the outcome variables individually. This step allowed us to  
333 assess the impact of the intervention on each outcome. To control for effect of confounders and  
334 effect modifiers, for each model with added predictors, we evaluated model fitness using the  
335 Pseudo Log-Likelihood values for model fitness and Adjusted Wald Test for significance of  
336 predictors. Higher (less negative) Pseudo Log-Likelihood values indicate better model fit and  
337 significant Wald test indicates importance of the predictors [47]. This approach allowed us to  
338 identify the most appropriate models for each outcome. Residual analysis was done to assess

339 homoscedasticity and normality of residuals by using histogram. The random intercept was  
340 insignificant and the model without the cluster variable provided a better fit to the data compared  
341 to the model accounting for clustering ( $P < 0.001$ ). Therefore, the simpler model without the  
342 cluster variable was used for the final analysis. However, to account for repeated measures at the  
343 individual level, the participant identification code was maintained in the final model. The data  
344 set on which the analysis based was provided as a supplementary file 2.

345

## 346 **Trial Registration**

347 The trial was registered at the Pan African Clinical Trial Registry (<https://pactr.samrc.ac.za>)  
348 database, with the registration number PACTR202302505126575.

349

## 350 **Results**

### 351 **Trial profile**

352 A total of 187 eligible women were randomized to the intervention group ( $n = 89$ ) or the control  
353 group (98). All of them completed the follow-up and completed the questionnaire at three and six  
354 months. The age of participant ranged from 19 to 80 years with the median of 36 years (IQR:  
355 31–50). All were parous, with a median of 4 childbirths (IQR: 4–6). The median hours of daily  
356 heavy lifting work were 4 hours (IQR: 3–5). The most common stage of prolapse was Stage II  
357 (64.4%). The median duration of feeling prolapse symptom was 48 (30 -60) months with the  
358 minimum of five months and maximum of 20 years. At baseline, a slightly higher number of  
359 women in menopause, family history of prolapse, and history of home birth were observed in the  
360 intervention group. The mean baseline POP-SS and quality of life domain scores were almost  
361 similar across the groups. Almost half 92 (49%) of the participants had prolapse of multiple  
362 vaginal compartments; whereby 161 (86%) had anterior prolapse, 113 (60.3%) had posterior  
363 prolapse and 28 (14.8%) had apical prolapse. Overall, the intervention and control arms were  
364 balanced in terms of most characteristics at baseline. Detailed sociodemographic characteristics  
365 are presented in Table 1.

366

367

368 **Table 1: Sociodemographic and Clinical Characteristics of Trial Participants at Baseline in**  
 369 **Sidama Region, Ethiopia (August 2024) (n = 187)**

| Variables                     | Category            | Control (n=98) | Intervention (n=89) | P-value              |
|-------------------------------|---------------------|----------------|---------------------|----------------------|
| Age at base line              | Median (IQR)        | 34 (30-37)     | 50 (35-60)          | < 0.001 <sup>¥</sup> |
| Age at first Birth            | Median (IQR)        | 18 (17-19)     | 17 (16-20)          | 0.12 <sup>¥</sup>    |
| Number of childbirths         | (Median (IQR)       | 4 (4-5)        | 5 (4-7)             | < 0.001 <sup>¥</sup> |
| Age at last delivery          | Median (IQR)        | 30 (26-32)     | 36 (29-42)          | < 0.001 <sup>¥</sup> |
| Level of Education            | No formal education | 67 (66.8%)     | 60 (69.47%)         | 0.7 <sup>©</sup>     |
|                               | Primary school      | 18 (17.9%)     | 20 (23.16%)         |                      |
|                               | Secondary and above | 15 (15.25%)    | 6 (7.4%)            |                      |
| Occupation                    | Employed            | 5 (5.4%)       | 5 (5.8%)            | 0.9 <sup>©</sup>     |
|                               | Un-employed         | 96 (94.6%)     | 81 (94.2%)          |                      |
| Menopause                     | Yes                 | 24 (24.2%)     | 53 (61%)            | 0.07 <sup>©</sup>    |
|                               | No                  | 77 (75.8%)     | 34 (39%)            |                      |
| Experience of prolonged labor | Yes                 | 62 (61%)       | 46 (53.2%)          | 0.5 <sup>©</sup>     |
|                               | No                  | 39 (39%)       | 40 (46.8%)          |                      |
| History of home birth         | Yes                 | 66 (65.5%)     | 63 (73.2%)          | 0.013 <sup>©</sup>   |
|                               | No                  | 35 (34.5%)     | 23 (26.8%)          |                      |
| Family history of prolapse    | Yes                 | 53 (52.5%)     | 8 (9%)              | 0.025 <sup>©</sup>   |
|                               | No                  | 48 (47.5%)     | 78 (91%)            |                      |
| Stage of prolapse             | Stage 1             | 11 (11.2%)     | 11 (13.2%)          | 0.8 <sup>©</sup>     |
|                               | Stage 2             | 65 (64.6%)     | 55 (64.2%)          |                      |
|                               | Stage 3             | 24 (24.2%)     | 19 (22.6%)          |                      |
| Body mass index               | <18.5               | 43 (42.15%)    | 38 (44.7%)          | 0.7 <sup>©</sup>     |
|                               | 18.5 – 24.9         | 55 (54.26%)    | 43 (49.5%)          |                      |



|                                            |                    |                  |                 |                   |
|--------------------------------------------|--------------------|------------------|-----------------|-------------------|
|                                            | >=25               | 4 (3.6%)         | 5 (5.8%)        |                   |
| Type (site) of prolapse                    | Anterior only      | 34 (34.1%)       | 37 (42.6%)      | 0.38 <sup>©</sup> |
|                                            | Posterior only     | 14 (14.4%)       | 10 (11.6%)      |                   |
|                                            | More than one site | 52 (51.6%)       | 39 (45.8%)      |                   |
| Mean Base-line POP-SS                      | Mean, SD           | 12.17 ± (4)      | 13.86 ± (4.4)   | 0.09 <sup>®</sup> |
| <b>Baseline Symptoms</b>                   |                    |                  |                 |                   |
| Protruding mass per vagina                 |                    | 97 (95.96%)      | 82 (95.79)      | 0.96 <sup>©</sup> |
| Vaginal Discomfort/pain                    |                    | 97 (95.96%)      | 83 (96.8%)      | 0.7 <sup>©</sup>  |
| Heaviness in the lower abdomen             |                    | 96 (95.1%)       | 77 (90%)        | 0.45 <sup>©</sup> |
| Lower back dragging                        |                    | 97 (96.4%)       | 79 (91.6%)      | 0.45 <sup>©</sup> |
| Strain to urinate                          |                    | 84.75 (84.75%)   | 81 (93.7%)      | 0.2 <sup>©</sup>  |
| Difficulty to empty bowel                  |                    | 77 (76.7%)       | 81 (93.7%)      | 0.03 <sup>©</sup> |
| Difficulty to empty bowel                  |                    | 73 (72.2%)       | 67 (78.4%)      | 0.7 <sup>©</sup>  |
| <b>Prolapse quality of life (baseline)</b> |                    |                  |                 |                   |
| Physical function                          | Median (IQR)       | 40.5 (29.7 - 51) | 43 (35 - 56.7)  | 0.31 <sup>¥</sup> |
| Personal relation                          | Median (IQR)       | 44.44 (33 - 55)  | 44.44 (33 - 55) | 0.7 <sup>¥</sup>  |
| Psychological function                     | Median (IQR)       | 46.69 (33 - 53)  | 40 (33 - 53)    | 0.9 <sup>¥</sup>  |

370 \*IQR= Inter-quartile range, SD=Standard Deviation; POP-SS = Pelvic organ prolapse  
 371 symptoms score. \*\* p-values presented with ¥ indicate Mann-Whitney U test, © indicate chi-  
 372 square test and ® indicate independent t-test.

373

374 **Adherence and Follow-up**

375 All study participants adhered strictly to their allocated treatment and completed the follow-up as  
376 scheduled. No participants changed their allocation, missed follow-up appointments, or failed to  
377 complete the treatment regimen. Consequently, while our analysis framework was based on the  
378 intention-to-treat principle, the actual adherence and follow-up were perfect, ensuring that all  
379 participants were analyzed according to their initial allocation.

380

### 381 **Prolapse Symptoms and Quality of Life at Six Months**

382 Women in the intervention group reported significant improvements in prolapse symptoms and  
383 across all domains of prolapse-related quality of life (P-QoL) at six months. In the unadjusted  
384 model, the most substantial improvement was observed in the physical function component of  
385 the P-QoL, with a mean change difference of -11.48 (99% CI: -15.9, -7.1), indicating a large  
386 effect size. Moreover, a significantly higher number of women in the intervention group reported  
387 their condition as “better” after the intervention compared to the control group (Table 2).

388 Table 2: Effect of pelvic floor muscle training on prolapse symptom and prolapse quality of life,  
389 Sidama Region, Ethiopia, August 2024.

| Outcome                                                 | 6months                |                         | Change difference from baseline (mean, 99% CI, p-value) |
|---------------------------------------------------------|------------------------|-------------------------|---------------------------------------------------------|
|                                                         | Intervention (n=89)    | Control (n=98)          |                                                         |
| POP-SS (mean ±SD)                                       | 8.4 (± 5.15)           | 10.8 (± 4.48)           |                                                         |
| Change from baseline (mean ±SD)                         | -5.44 (± 4.04)         | -1.34 (± 2.47)          | - 4.11 (-5.08 -3.14)                                    |
|                                                         | P < 0.001 <sup>υ</sup> | P < 0.001 <sup>υ</sup>  | P < 0.001 <sup>ψ</sup>                                  |
| <b>Prolapse-Quality of life</b>                         |                        |                         |                                                         |
| Physical function (mean ±SD)                            | 28.89 ± (15.6)         | 38.1 ± (18.1)           |                                                         |
| Change from baseline physical function (mean ±SD)       | -14.2 ± (14.88)        | -2.4 ± (5.69)           | - 11.48 (-15.9, -7.1)                                   |
|                                                         | P< 0.001 <sup>υ</sup>  | P = 0.0076 <sup>υ</sup> | P< 0.001 <sup>ψ</sup>                                   |
| Psychological function (mean, ±SD)                      | 24.96 ± (10.95)        | 35.5 ± (14.33)          |                                                         |
| Change from baseline psychological function (mean, ±SD) | -17.76 ± (17.5)        | -6.52 ± (10.4)          | -11.24 (-16.8, -5.7)                                    |
|                                                         | P < 0.001 <sup>υ</sup> | P < 0.001 <sup>υ</sup>  | P = 0.01 <sup>ψ</sup>                                   |
| Personal relation (mean, ±SD)                           | 30.17 ± (15.13)        | 38.5 ± (15.89)          |                                                         |
| Change from baseline personal relation (mean, ±SD)      | -12.8 ± (15.8)         | -3.8 ± (8.5)            | -8.97 (-13.9, -4.02)                                    |
|                                                         | P < 0.001 <sup>υ</sup> | P < 0.001 <sup>υ</sup>  | P < 0.001 <sup>ψ</sup>                                  |
| <b>Perceived improvement after intervention</b>         |                        |                         |                                                         |
| Better                                                  | 72 (84.2%)             | 42 (41.7%)              | 0.0049 <sup>ⓐ</sup>                                     |
| No change                                               | 10 (11.58%)            | 32 (31.8%)              |                                                         |
| Worse                                                   | 4 (4.2%)               | 27 (26.46%)             |                                                         |
| <b>POP-SS at 6<sup>th</sup> months</b>                  |                        |                         |                                                         |
| Protruding mass per vagina                              | 71 (82.1%)             | 100 (98.65%)            | 0.009 <sup>ⓐ</sup>                                      |
| Vaginal discomfort/pain                                 | 69(80%)                | 100 (98.65%)            | 0.005 <sup>ⓐ</sup>                                      |
| Heaviness in the lower abdomen                          | 58 (67.67%)            | 93 (92.38%)             | 0.06 <sup>ⓐ</sup>                                       |
| Lower back dragging                                     | 64 (74.74%)            | 95 (93.7%)              | 0.048 <sup>ⓐ</sup>                                      |
| Strain to urinate                                       | 58 (69.47%)            | 81 (79.8%)              | 0.2 <sup>ⓐ</sup>                                        |

|                           |             |             |                   |
|---------------------------|-------------|-------------|-------------------|
| Difficulty to empty bowel | 58 (67.37%) | 70 (69.5%)  | 0.46 <sup>©</sup> |
| Difficulty to empty bowel | 46 (53.2%)  | 67 (66.37%) | 0.19 <sup>©</sup> |

390 \*CI= confidence interval; SD=Standard Deviation; POP-SS = Pelvic organ prolapse symptoms  
 391 score; n = sample size. \*\* p-values presented with <sup>v</sup> indicate paired t-test, <sup>ψ</sup> was based on mixed-  
 392 effects generalized linear model and <sup>©</sup> indicate chi-square test.

393

394 All prolapse symptoms were significantly improved from the baseline for the intervention group  
 395 but in the control group, “a feeling of vaginal discomfort/pain and something passing through  
 396 vagina remained persistent”. Compared to the control groups, a significant reduction in POP-SS  
 397 scores were observed in two items “a feeling of vaginal discomfort/pain and something passing  
 398 through vagina.

399

400 **Effect modification and effect of other covariates on pelvic organ prolapses and quality of**  
 401 **life**

402 We observed no significant interactions between the intervention arms and any variable  
 403 including stage of prolapse, duration of symptom, occupation, educational status and site of  
 404 prolapse. However, women in the stage I and II prolapses experienced more marked  
 405 improvements compared to stage III prolapse both in prolapse symptom and quality of life.  
 406 Women with higher POP-SS scores, indicating more severe symptoms, experienced less  
 407 improvement in the physical domain of quality of life compared to those with lower scores. The  
 408 analysis showed that as the severity of prolapse symptoms increased, the associated  
 409 improvements in the physical domain of the Prolapse Quality of Life (P-QoL) questionnaire  
 410 were diminished. Moreover, after adjusting for the severity of prolapse symptoms and the stage  
 411 of prolapse, the effect of PFMT on the physical domain of quality of life was slightly diminished  
 412 but showed increased effects in the personal relationship and psychological domains (Table 3).

413

414 Table 3: Pelvic floor muscle training effect modifiers on prolapse symptom and quality of life,  
 415 Sidama Region, Ethiopia, August 2024.

| Predictors                    | Category            | $\beta$ (crude) | $\beta$ (adjusted) | 99%CI            | p-value |
|-------------------------------|---------------------|-----------------|--------------------|------------------|---------|
| <b>POP-SS</b>                 |                     |                 |                    |                  |         |
| Intervention                  | Mean change         | - 4.1           | -4.1               | -5.38, -2.83     | < 0.001 |
| Stage                         | Stage I             | -5.22           | -5.08              | -7.5, -2.6       | < 0.001 |
|                               | Stage II            | -3.03           | -3.06              | -4.9, -1.2       | < 0.001 |
|                               | Stage III           | Ref             | Ref                |                  |         |
| Symptom duration              |                     | 0.04            | 0.02               | -0.03, 0.07      | 0.35    |
| prolong labor                 |                     | 1.22            | 0.8                | -0.7, 2.3        | 0.17    |
| Education                     | Not educated        | Ref             | Ref                |                  |         |
|                               | Primary school      | -0.5            | -0.18              | -1.39, 1.03      | 0.77    |
|                               | Secondary and above | 0.04            | -0.1               | -1.68, 1.46      | 0.8     |
| <b>Physical Function</b>      |                     |                 |                    |                  |         |
| Intervention effect           | Mean change         | - 11.47         | -9.2               | -14.9, -3.5      | < 0.001 |
| Stage                         | Stage I             | -39             | -34.9              | -40.46, -29.4    | < 0.001 |
|                               | Stage II            | -18.37          | -16                | -21.17, -12.3    | < 0.001 |
|                               | Stage III           | Ref             | Ref                |                  |         |
| POP-SS                        |                     | 1.45            | 0.69               | 0.23, 1.14       | 0.003   |
| <b>Personal relationship</b>  |                     |                 |                    |                  |         |
| Intervention effect           | Mean change         | -8.97           | -9.47              | (-15.5, -3.5)    | < 0.001 |
| Stage of prolapse             | Stage I             | -24.3           | -22.1              | (-29.95, -14.26) | < 0.001 |
|                               | Stage II            | -15.12          | -14.6              | (-20.95, -8.3)   | < 0.001 |
|                               | Stage III           | Ref             | Ref                |                  |         |
| POP-SS                        |                     | 0.83            | 0.56               | (-0.06, 1.16)    | 0.02    |
| <b>Psychological function</b> |                     |                 |                    |                  |         |
| Intervention effect           | Mean change         | -11.24          | -12.65             | (-19.3, -6.1)    | 0.001   |
| Stage of prolapse             | Stage I             | -18.57          | -16.1              | (-24,0, -8.14)   | 0.001   |

|        |           |       |      |              |       |
|--------|-----------|-------|------|--------------|-------|
|        | Stage II  | -5.53 | -4.8 | (-11.3, 1.6) | 0.054 |
|        | Stage III | Ref   | Ref  |              |       |
| POP-SS |           | 0.33  | 0.24 | (-0.39, 1.1) | 0.24  |

416 \*POP-SS = pelvic organ prolapses symptom score, CI= confidence interval, Ref= reference  
 417 category. \*\* The regression table shows a combination of four different regression tables (POP-  
 418 SS and three domains of Prolapse quality of life).

### 419 Adverse Events

420 No adverse events were observed.

421

### 422 Discussion

423 This study showed that midwife-led pelvic floor muscle training combined with lifestyle  
 424 counselling significantly improves prolapse symptoms with a mean change difference of -4.1 in  
 425 prolapse symptom score and each domain of prolapse-quality of life with a mean change  
 426 difference of -11.48 in the physical domain, -9.47 in the personal relationship domain, and -  
 427 12.65 in the psychological domain. A significantly higher number of women in the intervention  
 428 group perceived their condition as “better” since the intervention compared to the control group,  
 429 highlighting the subjective benefit of PFMT. The effects of PFMT were more noticeable in  
 430 women with prolapse stage-I with a mean change difference of -5.08 and stage II with a mean  
 431 change difference of -3.06 as compared to stage III in reducing POP-SS. Similar effect was  
 432 observed on each domain of P-QoL. In addition, severity of prolapse symptoms was associated  
 433 with physical function of the P-QoL domain with a mean change difference of 0.6 compared to  
 434 minor prolapse symptoms indicating that more severe symptoms were linked to less  
 435 improvement.

436 The results of the present study align with existing literature from developed countries indicating  
 437 the benefit of PFMT for the treatment of POP symptoms and quality of life. A multicenter  
 438 Randomized Controlled Trial (RCT) study from 25 centers (United Kingdom, Dunedin, New  
 439 Zealand and Australia) conducted by Hagen et al. [15] showed that PFMT led to significant  
 440 reduction in POP symptoms and improved quality of life. A single center RCT and systematic  
 441 review of RCT findings also show that PFMT is effective in reducing POP-symptoms, prolapse

442 stage and quality of life in women with POP-Q stage I-III [4]. Based on the findings of those  
443 studies, the Cochrane reviews [48, 49] and national institute for health and care excellence  
444 (NICE) guidelines [50] recommended PFMT as a first line of treatment for incontinence and  
445 pelvic organ prolapse, to be provided at primary care facilities [51]. Our finding extends these  
446 findings and recommendations to a low-income setting which is of a different cultural and health  
447 care context, highlighting the universal applicability of PFMT across diverse settings. Moreover,  
448 the observed difference in mean change is statistically significant and clinically important as it  
449 exceeded the minimally important change of 1.5 for POP-SS [52]. Again, a remarkable  
450 improvement was reported on “a feeling of vaginal discomfort/pain and protruding mass through  
451 vagina” which are the major indicators for prolapse surgery and regarded as the most crucial  
452 treatment target [53]. The significant reduction in these key symptoms underscores the  
453 importance of PFMT. These two symptoms are closely linked to the physical support provided  
454 by the pelvic floor muscles. Strengthening these muscles through PFMT may lead to a more  
455 noticeable reduction in these specific symptoms compared to others that may be less directly  
456 influenced by muscle strength or may involve more complex physiological changes.

457 The existing evidence shows that the improvement in POP-SS and P-QoL after PFMT can be  
458 attributable to several mechanisms. Overall, PFMT strengthens the pelvic floor muscle,  
459 providing better support for pelvic organs which can reduce/stop degree of prolapse and alleviate  
460 associated symptoms like vaginal bulging, discomfort, and lower back pain [43, 54]. Enhanced  
461 muscle strength also improves urinary and bowel control, reducing symptoms like straining to  
462 urinate and difficulty emptying the bowel [54, 55]. The contraction and relaxation of pelvic floor  
463 muscles during PFMT promote blood flow to the pelvic region and stimulate the nerves in the  
464 area, improving nerve function [56].

465 In the present study, women with stage I and II prolapses reported more noticeable  
466 improvements compared to those with stage III prolapses indicating that the earlier stage of  
467 prolapse are more responsive to PFMT. Borello-France and colleagues reported that women with  
468 stage II prolapse were better able to elevate their pelvic floor than those with stage III or IV [57].  
469 Severity of prolapse symptoms was associated with physical function suggesting that more  
470 severe POP-SS causes less improvement. After adjusting for prolapse stage and symptom

471 severity, the effect of PFMT remained significant with slightly reduced effect on physical  
472 function but slightly increased effects on personal relationship and psychological domains.

473 The findings of this study have important implications for clinical practice and public health  
474 policy in low-resource settings. The first implication is that the result suggest that midwife-led  
475 PFMT can be considered as a first-line conservative treatment for mild to moderate stage of  
476 prolapse in all settings especially in resource limited settings where access to specialized care is  
477 limited. This can be integrated in to the existing maternal and reproductive health programs. The  
478 second implication is that in settings where the number of urogynecologists/pelvic physiotherapy  
479 expert is limited, like the current Ethiopian context, training midwives to deliver PFMT and  
480 lifestyle counseling is feasible and effective to address prolapse symptoms and improve quality  
481 of life among women with POP. We recognize that the most recommended form of PFMT is  
482 supervised training given by a physiotherapist or urogynecologists who have greater in-depth  
483 knowledge [1]. However, this is not feasible in low-resource settings due to shortage of trained  
484 specialists (only less than 28 urogynecologists in Ethiopia). It was evidenced that nurse-delivered  
485 PFMT have comparable effect with those delivered by specialists when implemented properly  
486 [58, 59]. In the present study, the observed mean change difference was relatively larger and the  
487 compliance/adherence to training was better compared to previous studies. This adherence might  
488 be because midwives working in the nearby health facility and the women in the intervention  
489 know each other, and that may create trust and acceptability. This is a nice model that can be  
490 scaled up in other settings including high income countries.

491 This study has its own strength and limitations. Among others, the key strength of the study  
492 includes the rigorous cluster randomized controlled design which enhances the internal validity  
493 of the finding, high adherence rate and complete follow-up which ensure the reliability of the  
494 results. The use of validated and culturally adapted measurement tools ensures the relevance and  
495 accuracy of the collected data, and also the use of a complex survey design, which accounts for  
496 the clustered nature of the data, enhances the potential generalizability of the results to the target  
497 population. Above all, to our knowledge, this study is the first to evaluate effect of PFMT on  
498 prolapse symptoms in Ethiopia.

499 However, some limitations should be considered. The reliance on self-reported adherence to  
500 PFMT and symptom improvement may introduce performance bias since the participants were



501 not blinded to the intervention. This participants' knowledge of their treatment allocation may  
502 influence their reported outcomes that could lead to higher treatment effect and reported  
503 adherence rate.

504

## 505 **Conclusion**

506 Midwife-led pelvic floor muscle training combined with lifestyle counseling significantly  
507 improves prolapse symptoms and quality of life across all domains in women with pelvic organ  
508 prolapse. The observed treatment effects were significant and clinically important. The effects of  
509 PFMT were higher in women with earlier stage of prolapse. Move over, in settings with shortage  
510 of urogynecologists, training midwives to deliver PFMT and lifestyle counselling is a feasible  
511 and effective approach to improve prolapse symptoms and quality of life. Future studies should  
512 incorporate objective measures of adherence and explore long-term effects. Healthcare  
513 organizations should advocate and endorse training of midwives and other healthcare providers  
514 to deliver PFMT.

515

## 516 **Declarations**

## 517 **Ethical Considerations and consent to participate**

518 This study was conducted in accordance with the principles of the Declaration of Helsinki.  
519 Ethical approval was obtained from Institutional Review Board of Hawassa University, College  
520 of Medicine and Health Sciences (Ref. No. IRB/157/14). Written informed consent was obtained  
521 with provisions for participants unable to read and write to sign with their index fingers,  
522 confirming that the consent had been read to them. Given the sensitive nature of the condition,  
523 data regarding self-reported prolapse symptoms were collected in a private location within the  
524 participants' homes. Pelvic examinations were conducted in delivery rooms to ensure  
525 participants' physical privacy, while lifestyle counseling and pelvic floor muscle training took  
526 place in private rooms. All study information was kept confidential, with participants assigned  
527 codes to replace their names and personally identifying information. Access to the key linking  
528 these codes to individual identities was restricted to the principal investigator. The risks to

529 participants were minimal. While there was potential for psychological distress related to the  
530 pelvic examination, as well as temporary discomfort during physical exams and inconvenience  
531 from follow-up visits, these risks were mitigated by allowing participants to withdraw from the  
532 study at any time during the consent process. The research team provided travel costs and time  
533 compensation, equivalent to approximately four dollars (200 Ethiopian Birr), to the participants.  
534 During baseline data collection, around 26 participants with stage IV prolapse were referred to  
535 the Yirgalem Hamlin Fistula Center for further management. After the study's completion,  
536 women with symptomatic stage III prolapse in the control group linked with the Yirgalem  
537 Hamlin Fistula Center for additional care.

### 538 **Consent for publication**

539 Not Applicable

### 540 **Authors contribution**

541 Melese Siyoum: Conceptualization, methodology, fund acquisition, mentorship, formal analysis,  
542 validation, writing original draft, review and editing on final version.

543 Rahel Nardos: Methodology, mentorship, fund acquisition, validation, reviewing and editing the  
544 manuscript

545 Biniyam Sirak: Methodology, fund acquisition, validation, reviewing and editing the manuscript

546 Theresa Spitznagle: Methodology, validation, reviewing and editing the manuscript

547 Wondwosen Teklesilassie: Methodology, validation, reviewing and editing the manuscript

548 Ayalew Astatkie: Conceptualization, methodology, formal analysis, validation, reviewing and  
549 editing the manuscript

550 All authors read and approved the final manuscript

### 551 **Acknowledgment**

552 We would like to thank our sponsors (Hawassa University, University of Minnesota, Worldwide  
553 Fistula Fund, and Maternal Health Fund) for their financial support. The study participants and  
554 data collectors also deserve gratitude. We also thank Dr. Karen Gold and Joseph Kinahan

555 (Maternal Health Fund), Soja Orłowski (Worldwide Fistula Fund), Katie Brown (University of  
556 Minnesota) and Alemu Tamiso (Hawassa University) for their facilitation in transferring funds.  
557 Yirgalem Hamlin Fistula Center, Health centers in the study area and Mr. Rekiku Fikre  
558 (Hawassa University) deserve acknowledgement for facilitating transportation service support in  
559 material.

#### 560 **Funding**

561 The payment for data collectors, participant transportation, and field supervisor per-diem was  
562 sponsored by Hawassa University, University of Minnesota, Worldwide Fistula Fund and  
563 Maternal Health Fund. The funders have no role in designing the study, intervention, data  
564 management and publication.

#### 565 **Conflict of interest**

566 All authors declare that they have no conflict of interest

#### 567 **Availability of data and materials**

568 The dataset used for this study is available within the manuscript and as supplementary file

569

570

571

573 **References**

- 574 1. Bo K, Frawley HC, Haylen BT, Abramov Y, Almeida FG, Berghmans B, et al. An  
575 International Urogynecological Association (IUGA)/International Continence Society (ICS) joint  
576 report on the terminology for the conservative and nonpharmacological management of female  
577 pelvic floor dysfunction. *International urogynecology journal*. 2017;28:191-213.
- 578 2. Bø K, Anglès-Acedo S, Batra A, Brækken IH, Chan YL, Jorge CH, et al. International  
579 urogynecology consultation chapter 3 committee 2; conservative treatment of patient with pelvic  
580 organ prolapse: pelvic floor muscle training. *International urogynecology journal*.  
581 2022;33(10):2633-67.
- 582 3. Hadizadeh-Talasaz Z, Khadivzadeh T, Mohajeri T, Sadeghi M. Worldwide Prevalence of  
583 Pelvic Organ Prolapse: A Systematic Review and Meta-Analysis. *Iranian Journal of Public  
584 Health*. 2024.
- 585 4. Brown HW, Hegde A, Huebner M, Neels H, Barnes HC, Marquini GV, et al.  
586 International urogynecology consultation chapter 1 committee 2: Epidemiology of pelvic organ  
587 prolapse: prevalence, incidence, natural history, and service needs. *International Urogynecology  
588 Journal*. 2022:1-15.
- 589 5. Barber MD, Maher C. Epidemiology and outcome assessment of pelvic organ prolapse.  
590 *International urogynecology journal*. 2013;24:1783-90.
- 591 6. Ward RM, Edwards DRV, Edwards T, Giri A, Jerome RN, Wu JM. Genetic  
592 epidemiology of pelvic organ prolapse: a systematic review. *American journal of obstetrics and  
593 gynecology*. 2014;211(4):326-35.
- 594 7. Ai F, Deng M, Mao M, Xu T, Zhu L. Depressive symptoms screening in postmenopausal  
595 women with symptomatic pelvic organ prolapse. *Menopause*. 2018;25(3):314-9.

- 596 8. Lowenstein L, Gamble T, Deniseiko Sanses TV, Van Raalte H, Carberry C, Jakus S, et  
597 al. Sexual function is related to body image perception in women with pelvic organ prolapse.  
598 *The journal of sexual medicine*. 2009;6(8):2286-91.
- 599 9. Ellerkmann RM, Cundiff GW, Melick CF, Nihira MA, Leffler K, Bent AE. Correlation  
600 of symptoms with location and severity of pelvic organ prolapse. *American journal of obstetrics*  
601 *and gynecology*. 2001;185(6):1332-8.
- 602 10. Swift SE, Tate SB, Nicholas J. Correlation of symptoms with degree of pelvic organ  
603 support in a general population of women: what is pelvic organ prolapse? *American journal of*  
604 *obstetrics and gynecology*. 2003;189(2):372-7.
- 605 11. Aponte MM, Rosenblum N. Repair of pelvic organ prolapse: what is the goal? *Current*  
606 *urology reports*. 2014;15:1-5.
- 607 12. Wiegersma M, Panman CM, Hesselink LC, Malmberg AG, Berger MY, Kollen BJ, et al.  
608 Predictors of success for pelvic floor muscle training in pelvic organ prolapse. *Physical Therapy*.  
609 2019;99(1):109-17.
- 610 13. Giagio S, Innocenti T, Salvioli S, Lami A, Meriggiola MC, Pillastrini P, et al.  
611 Completeness of exercise reporting among randomized controlled trials on pelvic floor muscle  
612 training for women with pelvic organ prolapse: A systematic review. *Neurourology and*  
613 *Urodynamics*. 2021;40(6):1424-32.
- 614 14. Abhyankar P, Uny I, Semple K, Wane S, Hagen S, Wilkinson J, et al. Women's  
615 experiences of receiving care for pelvic organ prolapse: a qualitative study. *BMC women's*  
616 *health*. 2019;19:1-12.

- 617 15. Hagen S, Stark D, Glazener C, Dickson S, Barry S, Elders A, et al. Individualised pelvic  
618 floor muscle training in women with pelvic organ prolapse (POPPY): a multicentre randomised  
619 controlled trial. *The Lancet*. 2014;383(9919):796-806.
- 620 16. Abhyankar P, Wilkinson J, Berry K, Wane S, Uny I, Aitchison P, et al. Implementing  
621 pelvic floor muscle training for women with pelvic organ prolapse: a realist evaluation of  
622 different delivery models. *BMC Health Services Research*. 2020;20:1-16.
- 623 17. Belayneh T, Gebeyehu A, Adefris M, Rortveit G, Gjerde JL, Ayele TA. Pelvic organ  
624 prolapse surgery and health-related quality of life: a follow-up study. *BMC Women's Health*.  
625 2021;21:1-11.
- 626 18. Workineh ZA, Ayana BA, Gashaye KT, Wubneh SB, Kassie BA. Surgical management  
627 practice of pelvic organ prolapse among Ethiopian gynecologists, 2021: a descriptive study.  
628 *BMC Women's Health*. 2023;23(1):654.
- 629 19. Sung VW, Jeppson P, Madsen A. Nonoperative management of pelvic organ prolapse.  
630 *Obstetrics & Gynecology*. 2023;141(4):724-36.
- 631 20. Footer CB, Tsegaye HS, Yitnagashaw TA, Mekonnen W, Shiferaw TD, Abera E, et al.  
632 Empowering the physiotherapy profession in Ethiopia through leadership development within  
633 the doctoring process. *Frontiers in Public Health*. 2017;5:51.
- 634 21. (FMoHE) TFDRoE. National Health Policy. In: Health, editor. Addis Ababa2024.
- 635 22. Moher D, Hopewell S, Schulz KF, Montori V, Gøtzsche PC, Devereaux PJ, et al.  
636 CONSORT 2010 explanation and elaboration: updated guidelines for reporting parallel group  
637 randomised trials. *Bmj*. 2010;340.
- 638 23. Campbell MK, Piaggio G, Elbourne DR, Altman DG. Consort 2010 statement: extension  
639 to cluster randomised trials. *Bmj*. 2012;345.

- 640 24. Siyoum M, Nardos R, Teklesilasie W, Astatkie A. Prevalence and risk factors of pelvic  
641 organ prolapse among women in Sidama region, Ethiopia: A community-based survey. *Women's*  
642 *Health*. 2024;20:17455057241265078.
- 643 25. Vértesy L, Lemango TB. Comparison of local governments in Hungary and Ethiopia. *DE*  
644 *IURISPRUDENTIA ET IURE PUBLICO: JOG-ÉS POLITIKATUDOMÁNYI FOLYÓIRAT=*  
645 *JOURNAL OF LEGAL AND POLITICAL SCIENCES*. 2022;13(1-2.):62-75.
- 646 26. Gedefaw AA. Analysis of the contribution of land registration to sustainable land  
647 management in East Gojjam Zone, Ethiopia. *Land*. 2023;12(6):1157.
- 648 27. Nefa SA, Ibrahim AM, Mulushewa SS, Wonga MM, Lee H-Y, Siyum GA, et al. Study  
649 design for the 2019 baseline survey of newly established longitudinal surveillance woredas as the  
650 field lab to serve child health improvement project of Benishangul-Gumuz region, Ethiopia.  
651 *Journal of Global Health Science*. 2019;1(2).
- 652 28. Donner A, Birkett N, Buck C. Randomization by cluster: sample size requirements and  
653 analysis. *American journal of epidemiology*. 1981;114(6):906-14.
- 654 29. Hemming K, Eldridge S, Forbes G, Weijer C, Taljaard M. How to design efficient cluster  
655 randomised trials. *bmj*. 2017;358.
- 656 30. Hayes RJ, Moulton LH. *Cluster randomised trials*: Chapman and Hall/CRC; 2017.
- 657 31. Rutterford C, Copas A, Eldridge S. Methods for sample size determination in cluster  
658 randomized trials. *International journal of epidemiology*. 2015;44(3):1051-67.
- 659 32. Roth SM, Ivey FM, Martel GF, Lemmer JT, Hurlbut DE, Siegel EL, et al. Muscle size  
660 responses to strength training in young and older men and women. *Journal of the American*  
661 *Geriatrics Society*. 2001;49(11):1428-33.

- 662 33. Maxwell M, Berry K, Wane S, Hagen S, McClurg D, Duncan E, et al. Pelvic floor  
663 muscle training for women with pelvic organ prolapse: the PROPEL realist evaluation. *Health  
664 Services and Delivery Research*. 2020;8(47).
- 665 34. Hay-Smith J, Bo K, Berghmans B, Hendriks E, de Bie R, van Doorn EvW. Pelvic floor  
666 muscle training for urinary incontinence in women. *The Cochrane database of systematic  
667 reviews*. 2008;2008(3).
- 668 35. Maxwell M, Semple K, Wane S, Elders A, Duncan E, Abhyankar P, et al. PROPEL:  
669 implementation of an evidence based pelvic floor muscle training intervention for women with  
670 pelvic organ prolapse: a realist evaluation and outcomes study protocol. *BMC health services  
671 research*. 2017;17:1-10.
- 672 36. Women's NCCf, Health Cs. *Urinary incontinence: The management of urinary  
673 incontinence in women*. 2006.
- 674 37. Bø K. Pelvic floor muscle exercise for the treatment of stress urinary incontinence: an  
675 exercise physiology perspective. *International Urogynecology Journal*. 1995;6(5):282-91.
- 676 38. Siyoum M, Teklesilasie W, Nardos R, Sirak B, Astatkie A. Reliability and validity of the  
677 Sidaamu Afoo version of the pelvic organ prolapse symptom score questionnaire. *BMC  
678 Women's Health*. 2023;23(1):324.
- 679 39. Hagen S, Glazener C, Sinclair L, Stark D, Bugge C. Psychometric properties of the pelvic  
680 organ prolapse symptom score. *BJOG: an International Journal of Obstetrics & Gynaecology*.  
681 2009;116(1):25-31.
- 682 40. Belayneh T, Gebeyehu A, Adefris M, Rortveit G, Genet T. Translation, transcultural  
683 adaptation, reliability and validation of the pelvic organ prolapse quality of life (P-QoL) in  
684 Amharic. *Health and quality of life outcomes*. 2019;17:1-11.



- 685 41. Digesu GA, Khullar V, Cardozo L, Robinson D, Salvatore S. P-QOL: a validated  
686 questionnaire to assess the symptoms and quality of life of women with urogenital prolapse.  
687 International Urogynecology Journal. 2005;16:176-81.
- 688 42. Srikrishna S, Robinson D, Cardozo L. Validation of the Patient Global Impression of  
689 Improvement (PGI-I) for urogenital prolapse. International urogynecology journal. 2010;21:523-  
690 8.
- 691 43. Brækken IH, Majida M, Engh ME, Bø K. Morphological changes after pelvic floor  
692 muscle training measured by 3-dimensional ultrasonography: a randomized controlled trial.  
693 Obstetrics & Gynecology. 2010;115(2 Part 1):317-24.
- 694 44. Reid F. Assessment of pelvic organ prolapse: a practical guide to the pelvic organ  
695 prolapse quantification. Obstetrics, Gynaecology & Reproductive Medicine. 2014;24(6):170-6.
- 696 45. McCulloch CE, Searle SR, Neuhaus JM. Generalized, linear, and mixed models: Wiley  
697 Online Library; 2001.
- 698 46. Bland JM, Altman DG. Multiple significance tests: the Bonferroni method. Bmj.  
699 1995;310(6973):170.
- 700 47. Heeringa SG, West BT, Berglund PA. Applied survey data analysis: chapman and  
701 hall/CRC; 2017.
- 702 48. Dumoulin C, Hunter KF, Moore K, Bradley CS, Burgio KL, Hagen S, et al. Conservative  
703 management for female urinary incontinence and pelvic organ prolapse review 2013: Summary  
704 of the 5th International Consultation on Incontinence. Neurourology and urodynamics.  
705 2016;35(1):15-20.
- 706 49. Hagen S, Stark D. Conservative prevention and management of pelvic organ prolapse in  
707 women. Cochrane Database of Systematic Reviews. 2011(12).

- 708 50. National Institute for Health and Care Excellence guideline NG123 N. Urinary  
709 incontinence and pelvic organ prolapse in women: management London 2019 [
- 710 51. Smith A, Bevan D, Douglas HR, James D. Management of urinary incontinence in  
711 women: summary of updated NICE guidance. *Bmj*. 2013;347.
- 712 52. Hagen S, Glazener C, Cook J, Herbison P, Toozs-Hobson P. Further properties of the  
713 pelvic organ prolapse symptom score: minimally important change and test-retest reliability.  
714 *Neurourol Urodyn*. 2010;29(6):1055-6.
- 715 53. Ge J, Wei X, Zhang H, Fang G. Pelvic floor muscle training in the treatment of pelvic  
716 organ prolapse: A meta-analysis of randomized controlled trials. *Actas Urológicas Españolas*  
717 (English Edition). 2021;45(1):73-82.
- 718 54. Blanchard V, Nyangoh-Timoh K, Fritel X, Fauconnier A, Pizzoferrato A-C. Importance  
719 of a pelvic floor lifestyle program in women with pelvic floor dysfunctions: A pilot study.  
720 *Journal of Gynecology Obstetrics and Human Reproduction*. 2021;50(4):102032.
- 721 55. Wiegersma M, Panman CM, Kollen BJ, Berger MY, Lisman-Van Leeuwen Y, Dekker  
722 JH. Effect of pelvic floor muscle training compared with watchful waiting in older women with  
723 symptomatic mild pelvic organ prolapse: randomised controlled trial in primary care. *Bmj*.  
724 2014;349.
- 725 56. Hagen S, Glazener C, McClurg D, Macarthur C, Elders A, Herbison P, et al. Pelvic floor  
726 muscle training for secondary prevention of pelvic organ prolapse (PREVPROL): a multicentre  
727 randomised controlled trial. *The lancet*. 2017;389(10067):393-402.
- 728 57. Borello-France DF, Handa VL, Brown MB, Goode P, Kreder K, Scheufele LL, et al.  
729 Pelvic-floor muscle function in women with pelvic organ prolapse. *Physical therapy*.  
730 2007;87(4):399-407.

731 58. Waterfield AE. A community study of pelvic floor muscle function in women: Exeter and  
732 Plymouth Peninsula Medical School; 2011.

733 59. Child S, Bateman A, Shuttleworth J, Gericke C, Freeman R. Can primary care nurse  
734 administered pelvic floor muscle training (PFMT) be implemented for the prevention and  
735 treatment of urinary incontinence? A study protocol. F1000Research. 2013;2.

736
